# Supplementary material for: The complete mitochondrial genomes of two skipper genera (Lepidoptera: Hesperiidae) and their associated phylogenetic analysis
Source: PubMed Central journal article supplement (PMC6202373; doi:10.1038/s41598-018-34107-1), 2018-10-25
Supplement: 41598_2018_34107_MOESM1_ESM.pdf [file 41598_2018_34107_MOESM1_ESM.pdf]

**The complete mitochondrial genomes of two skipper genera  
(Lepidoptera: Hesperiiidae) and their associated phylogenetic  
analysis**

Yuke Han<sup>1,\*</sup>, Zhenfu Huang<sup>1,\*</sup>, Jing Tang<sup>1</sup>, Hideyuki Chiba<sup>2</sup> & Xiaoling Fan<sup>1</sup>

<sup>1</sup>Department of Entomology, South China Agricultural University, College of  
Agriculture, Guangzhou, 510642, China.

<sup>2</sup>B. P. Bishop Museum, Honolulu, Hawaii, 96817-0916, U.S.A.

\*These authors contributed equally to this work.

Correspondence and requests for materials should be addressed to X. F. (email:  
[fanxiaol66@scau.edu.cn](mailto:fanxiaol66@scau.edu.cn) )

**Supplementary Material S1. Composition and skewness of *Aposticopterus fuliginosus* and *Barca bicolor*.**

**Supplementary Material S2. The secondary structures of tRNA of both two species.**

**Supplementary Material S3. Best-fit partition schemes were selected by PartitionFinder and the corresponding best-fit model were selected by ModelFinder.**

**Supplementary Material S4. The trees based on different datasets and methods.**

**Supplementary Material S5. List of primers used to amplify and sequence two mitochondrial genomes.**

**Supplementary Material S1. Composition and skewness of *Apostictopterus fuliginosus* and *Barca bicolor*.**

|                                    |              | <b>T (bp)</b> | <b>A (bp)</b> | <b>C (bp)</b> | <b>G (bp)</b> | <b>Total Size (bp)</b> | <b>AT skew</b> | <b>GC skew</b> |
|------------------------------------|--------------|---------------|---------------|---------------|---------------|------------------------|----------------|----------------|
| <i>Apostictopterus fuliginosus</i> | tRNA         | 609           | 609           | 147           | 110           | 1475                   | 0              | -0.144         |
|                                    | %            | 41.30         | 41.00         | 10.00         | 8.00          |                        |                |                |
|                                    | rRNA         | 971           | 900           | 217           | 101           | 2189                   | -0.038         | -0.365         |
|                                    | %            | 44.4          | 41.1          | 9.9           | 4.6           |                        |                |                |
|                                    | AT-region    | 203           | 182           | 15            | 7             | 407                    | -0.055         | -0.364         |
|                                    | %            | 49.9          | 44.7          | 3.7           | 1.7           |                        |                |                |
|                                    | PCGs         | 5088          | 3736          | 1169          | 1201          | 11194                  | -0.153         | 0.013          |
|                                    | %            | 45.5          | 33.4          | 10.4          | 10.7          |                        |                |                |
|                                    | Whole genome | 6259          | 6188          | 1822          | 1148          | 15417                  | -0.006         | -0.227         |
| %                                  | 40.6         | 40.1          | 11.8          | 7.4           |               |                        |                |                |
| <i>Barca bicolor</i>               | tRNA         | 597           | 592           | 158           | 117           | 1464                   | -0.004         | -0.15          |
|                                    | %            | 40.80         | 40.40         | 10.80         | 8.00          |                        |                |                |
|                                    | rRNA         | 921           | 926           | 239           | 106           | 2192                   | 0.003          | -0.386         |
|                                    | %            | 42.2          | 10.9          | 4.8           | 42            |                        |                |                |
|                                    | AT-region    | 284           | 281           | 33            | 16            | 614                    | -0.005         | -0.347         |
|                                    | %            | 46.3          | 45.8          | 5.4           | 2.6           |                        |                |                |
|                                    | PCGs         | 4997          | 3662          | 1262          | 1275          | 11196                  | -0.154         | 0.005          |
|                                    | %            | 44.6          | 32.7          | 11.3          | 11.4          |                        |                |                |
|                                    | Whole genome | 6137          | 6227          | 2005          | 1205          | 15574                  | 0.007          | -0.249         |
| %                                  | 39.4         | 40            | 12.9          | 7.7           |               |                        |                |                |

Supplementary Material S2. The secondary structures of tRNA of both two species.

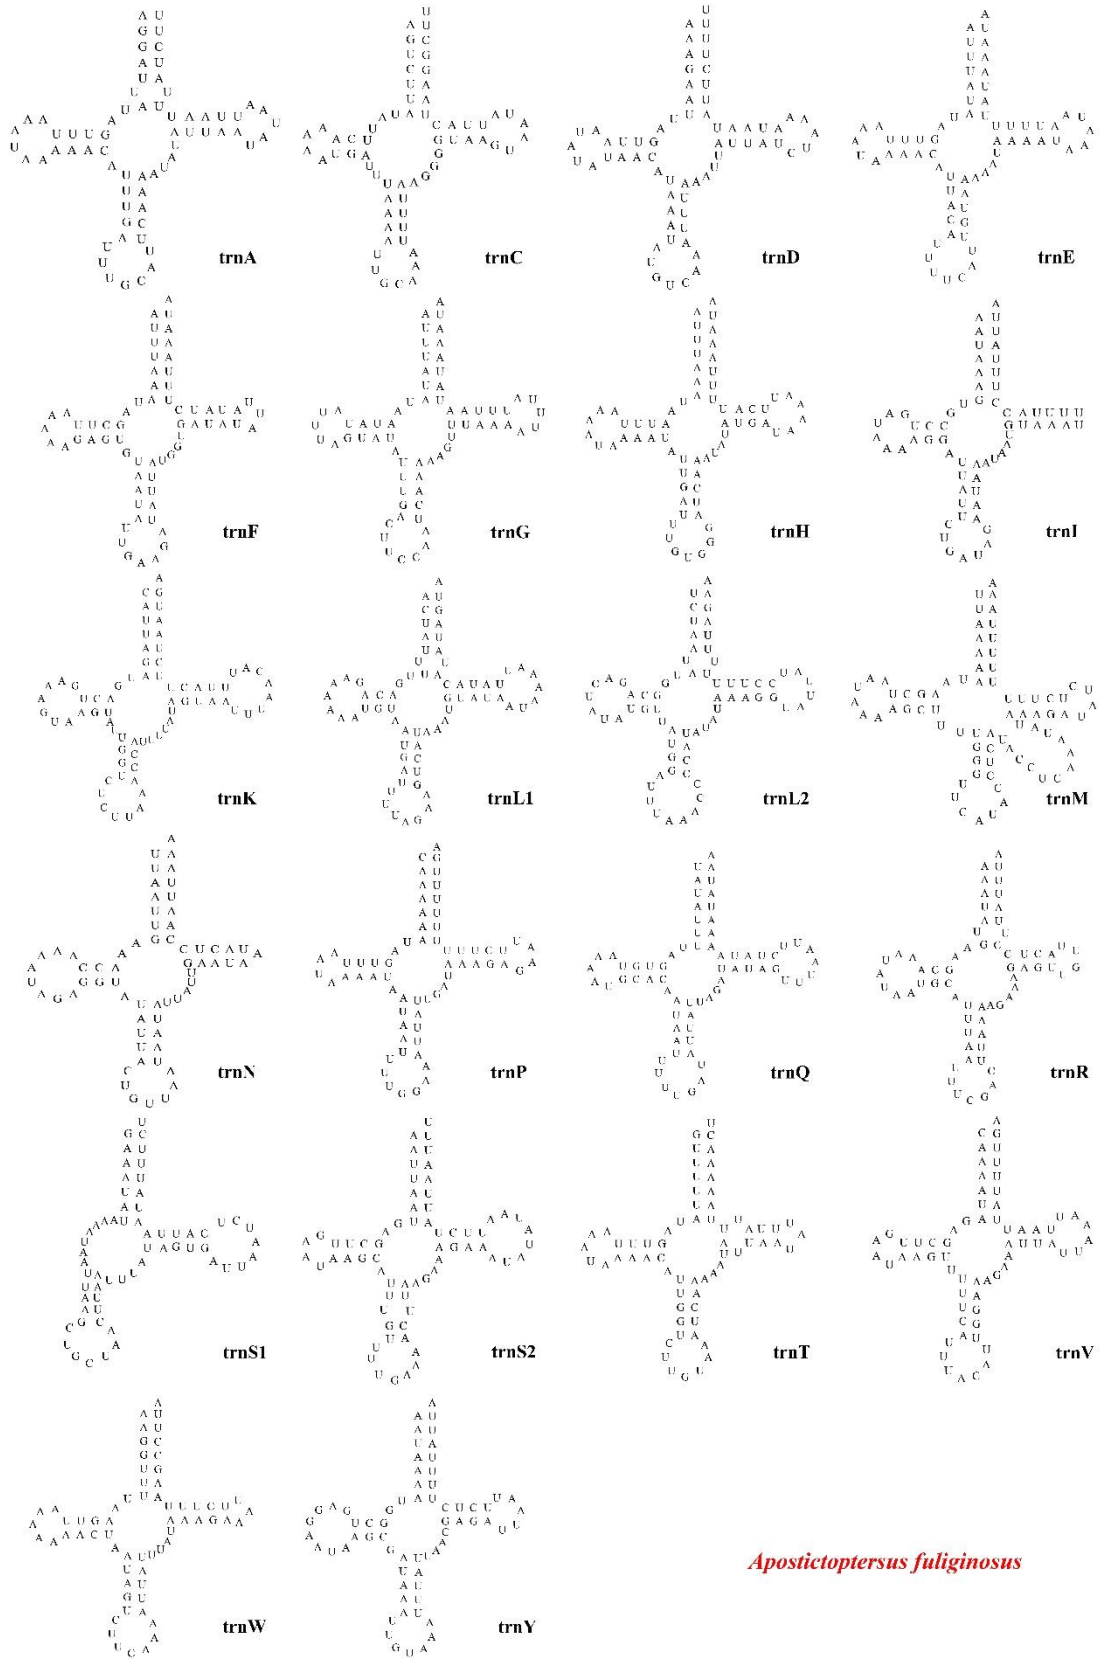



**Supplementary Material S3. Best-fit partition schemes were selected by PartitionFinder and the corresponding best-fit model were selected by ModelFinder.**

ATP6\_pos1 = 1-687\3;  
ATP6\_pos2 = 2-687\3;  
ATP6\_pos3 = 3-687\3;  
ATP8\_pos1 = 688-864\3;  
ATP8\_pos2 = 689-864\3;  
ATP8\_pos3 = 690-864\3;  
COI\_pos1 = 865-2415\3;  
COI\_pos2 = 866-2415\3;  
COI\_pos3 = 867-2415\3;  
COII\_pos1 = 2416-3112\3;  
COII\_pos2 = 2417-3112\3;  
COII\_pos3 = 2418-3112\3;  
COIII\_pos1 = 3113-3928\3;  
COIII\_pos2 = 3114-3928\3;  
COIII\_pos3 = 3115-3928\3;  
CYTB\_pos1 = 3929-5095\3;  
CYTB\_pos2 = 3930-5095\3;  
CYTB\_pos3 = 3931-5095\3;  
ND1\_pos1 = 5096-6052\3;  
ND1\_pos2 = 5097-6052\3;  
ND1\_pos3 = 5098-6052\3;  
ND2\_pos1 = 6053-7079\3;  
ND2\_pos2 = 6054-7079\3;  
ND2\_pos3 = 6055-7079\3;  
ND3\_pos1 = 7080-7436\3;  
ND3\_pos2 = 7081-7436\3;  
ND3\_pos3 = 7082-7436\3;  
ND4\_pos1 = 7437-8805\3;  
ND4\_pos2 = 7438-8805\3;  
ND4\_pos3 = 7439-8805\3;  
ND4L\_pos1 = 8806-9135\3;  
ND4L\_pos2 = 8807-9135\3;  
ND4L\_pos3 = 8808-9135\3;  
ND5\_pos1 = 9136-10908\3;  
ND5\_pos2 = 9137-10908\3;  
ND5\_pos3 = 9138-10908\3;  
ND6\_pos1 = 10909-11461\3;  
ND6\_pos2 = 10910-11461\3;  
ND6\_pos3 = 10911-11461\3;  
lrRNA = 11462-12410;  
srRNA = 12411-13001;

tRNA\_Ala =13002-13087;  
tRNA\_Arg= 13088-13171;  
tRNA\_Asn =13172-13245;  
tRNA\_Asp= 13246-13321;  
tRNA\_Cys= 13322-13395;  
tRNA\_Gln= 13396-13464;  
tRNA\_Glu= 13465-13553;  
tRNA\_Gly= 13554-13625;  
tRNA\_His= 13626-13707;  
tRNA\_Ile= 13708-13779;  
tRNA\_Leu1= 13780-13871;  
tRNA\_Leu2= 13872-13940;  
tRNA\_Lys= 13941-14011;  
tRNA\_Met= 14012-14091;  
tRNA\_Phe= 14092-14162;  
tRNA\_Pro= 14163-14233;  
tRNA\_Ser= 14234-14317;  
tRNA\_Ser2= 14318-14402;  
tRNA\_Thr = 14403-14484;  
tRNA\_Trp = 14485-14556;  
tRNA\_Tyr = 14557-14628;  
tRNA\_Val = 14629-14715;

#### PCGD:

##### **Partition:**

charset Subset1 = 2416-3112\2 3929-5095\2 2417-3112\2 1-687\2 7080-7436\2 7081-7436\2  
2-687\2 3930-5095\2 3114-3928\2 3113-3928\2;

charset Subset2 = 689-864\2 688-864\2 10910-11461\2 10909-11461\2;

charset Subset3 = 866-2415\2 865-2415\2;

charset Subset4 = 8807-9135\2 7437-8805\2 7438-8805\2 5096-6052\2 5097-6052\2 9137-  
10908\2 8806-9135\2 9136-10908\2;

charset Subset5 = 6053-7079\2 6054-7079\2;

##### **ML charpartition mymodels =**

GTR+F+I+G4: Subset1,

GTR+F+I+G4: Subset2,

GTR+F+I+G4: Subset3,

GTR+F+I+G4: Subset4,

TIM+F+I+G4: Subset5;

#### PCGC:

##### **Partition:**

charset Subset1 = 10909-11461\3 6053-7079\3 1-687\3 7080-7436\3;

charset Subset2 = 2417-3112\3 3114-3928\3 2-687\3 7081-7436\3 3930-5095\3;

charset Subset3 = 3-687\3 6055-7079\3;  
 charset Subset4 = 688-864\3 689-864\3;  
 charset Subset5 = 690-864\3 10911-11461\3 2418-3112\3 7082-7436\3 867-2415\3 3115-3928\3  
 3931-5095\3;  
 charset Subset6 = 865-2415\3;  
 charset Subset7 = 866-2415\3;  
 charset Subset8 = 2416-3112\3 3113-3928\3 3929-5095\3;  
 charset Subset9 = 7438-8805\3 8806-9135\3 5096-6052\3 9137-10908\3;  
 charset Subset10 = 8807-9135\3 5097-6052\3 9138-10908\3;  
 charset Subset11 = 5098-6052\3 8808-9135\3;  
 charset Subset12 = 10910-11461\3 6054-7079\3;  
 charset Subset13 = 7439-8805\3 7437-8805\3;  
 charset Subset14 = 9136-10908\3;

**ML charpartition mymodels =**

GTR+F+I+G4: Subset1,  
 TVM+F+I+G4: Subset2,  
 TN+F+G4: Subset3,  
 F81+F+I+G4: Subset4,  
 TIM+F+G4: Subset5,  
 TIM2+F+G4: Subset6,  
 F81+F+I+G4: Subset7,  
 GTR+F+I+G4: Subset8,  
 TIM+F+I+G4: Subset9,  
 GTR+F+I+G4: Subset10,  
 TPM2+F+I+G4: Subset11,  
 HKY+F+I+G4: Subset12,  
 GTR+F+I+G4: Subset13,  
 TPM2u+F+G4: Subset14;

**PCGR:**

**Partition:**

charset Subset1 = 2416-3112\2 2417-3112\2 3929-5095\2 1-687\2 7080-7436\2 7081-7436\2  
 2-687\2 3930-5095\2 3114-3928\2 3113-3928\2;  
 charset Subset2 = 689-864\2 688-864\2 10909-11461\2 10910-11461\2;  
 charset Subset3 = 866-2415\2 865-2415\2;  
 charset Subset4 = 8807-9135\2 7437-8805\2 7438-8805\2 5096-6052\2 5097-6052\2 9137-  
 10908\2 8806-9135\2 9136-10908\2;  
 charset Subset5 = 6053-7079\2 6054-7079\2;  
 charset Subset6 = 12411-13001 11462-12410;

**ML charpartition mymodels =**

GTR+F+I+G4: Subset1,  
 GTR+F+I+G4: Subset2,  
 GTR+F+I+G4: Subset3,  
 GTR+F+I+G4: Subset4,



TIM+F+I+G4: Subset5,  
GTR+F+I+G4: Subset6;

PRT:

**Partition:**

charset Subset1 = 14092-14162 13626-13707 10909-11461\3 6053-7079\3 13780-13871 1-687\3 7080-7436\3;

charset Subset2 = 13941-14011 13872-13940 2-687\3 2417-3112\3 3114-3928\3 3930-5095\3;

charset Subset3 = 3-687\3 6055-7079\3;

charset Subset4 = 688-864\3 689-864\3;

charset Subset5 = 690-864\3 10911-11461\3 2418-3112\3 3931-5095\3 867-2415\3 3115-3928\3 7082-7436\3;

charset Subset6 = 865-2415\3;

charset Subset7 = 866-2415\3;

charset Subset8 = 13396-13464 2416-3112\3;

charset Subset9 = 3113-3928\3 3929-5095\3 13322-13395 14485-14556 14012-14091;

charset Subset10 = 7438-8805\3 13708-13779 8806-9135\3 5096-6052\3 9137-10908\3;

charset Subset11 = 8807-9135\3 9138-10908\3 5097-6052\3;

charset Subset12 = 5098-6052\3;

charset Subset13 = 7081-7436\3 10910-11461\3 6054-7079\3;

charset Subset14 = 7439-8805\3 7437-8805\3;

charset Subset15 = 9136-10908\3 8808-9135\3;

charset Subset16 = 14163-14233 14557-14628 14629-14715 12411-13001 11462-12410 13246-13321 13465-13553 13088-13171 13172-13245 13554-13625 14318-14402 14234-14317 13002-13087 14403-14484;

**ML charpartition mymodels =**

GTR+F+I+G4: Subset1,

TVM+F+I+G4: Subset2,

TN+F+G4: Subset3,

F81+F+I+G4: Subset4,

TIM+F+G4: Subset5,

TIM2+F+G4: Subset6,

F81+F+I+G4: Subset7,

TN+F+I+G4: Subset8,

GTR+F+I+G4: Subset9,

TIM+F+I+G4: Subset10,

GTR+F+I+G4: Subset11,

TIM2+F+G4: Subset12,

HKY+F+I+G4: Subset13,

GTR+F+I+G4: Subset14,

TIM+F+I+G4: Subset15,

GTR+F+I+G4: Subset16;

**Supplementary Material S4. The trees based on different datasets and methods.**

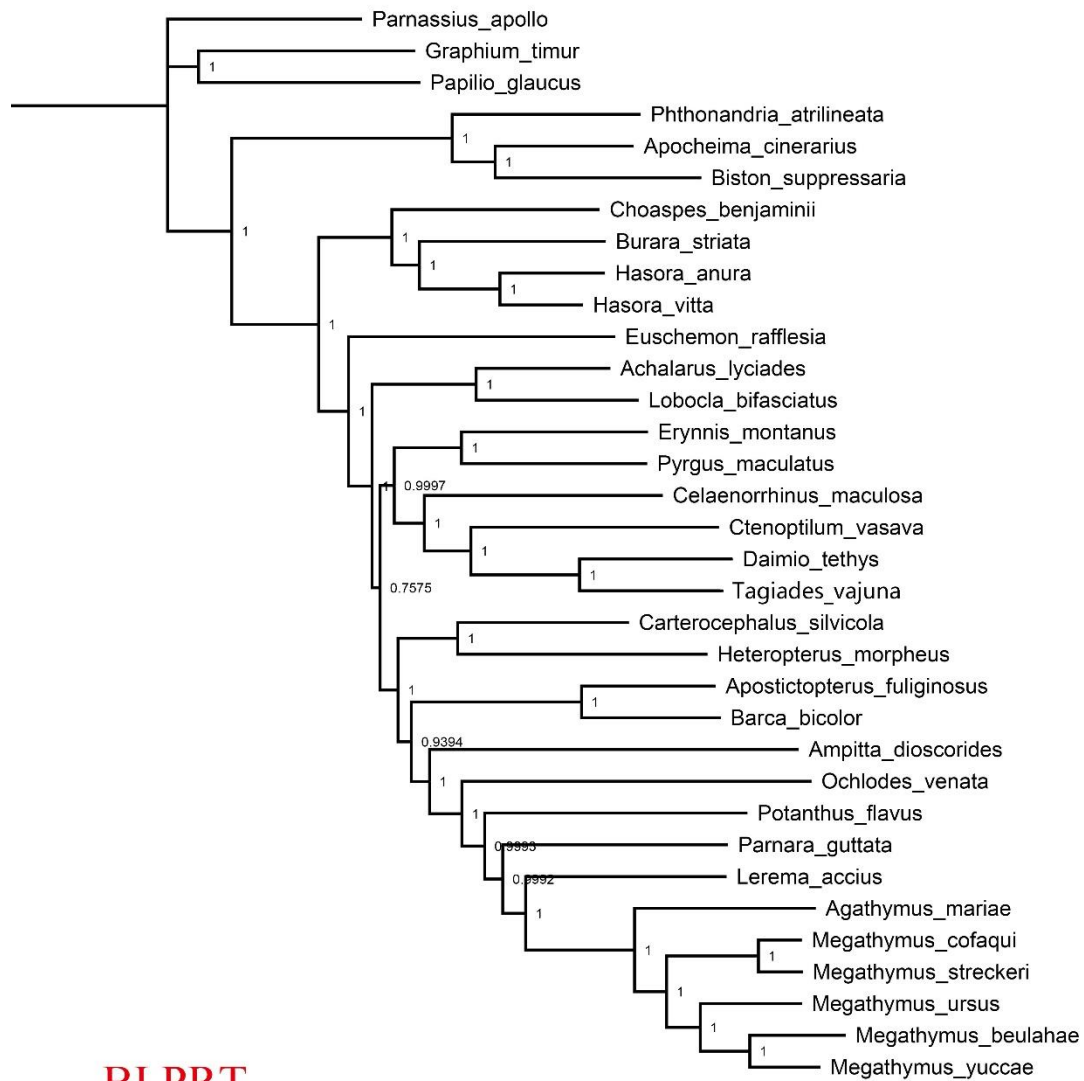

**BI PRT**

0.04

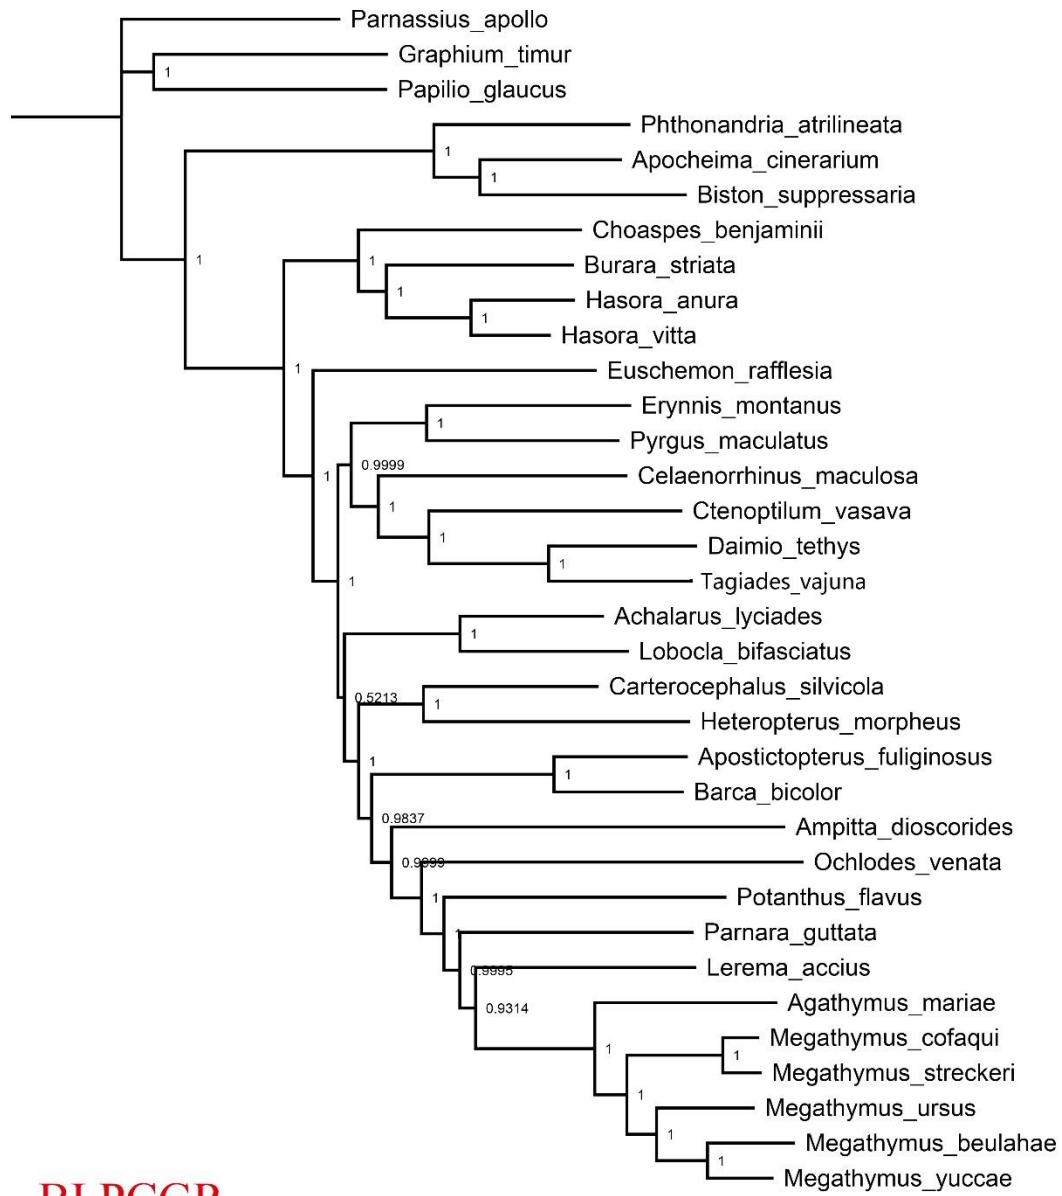

BI PCGR

0.07

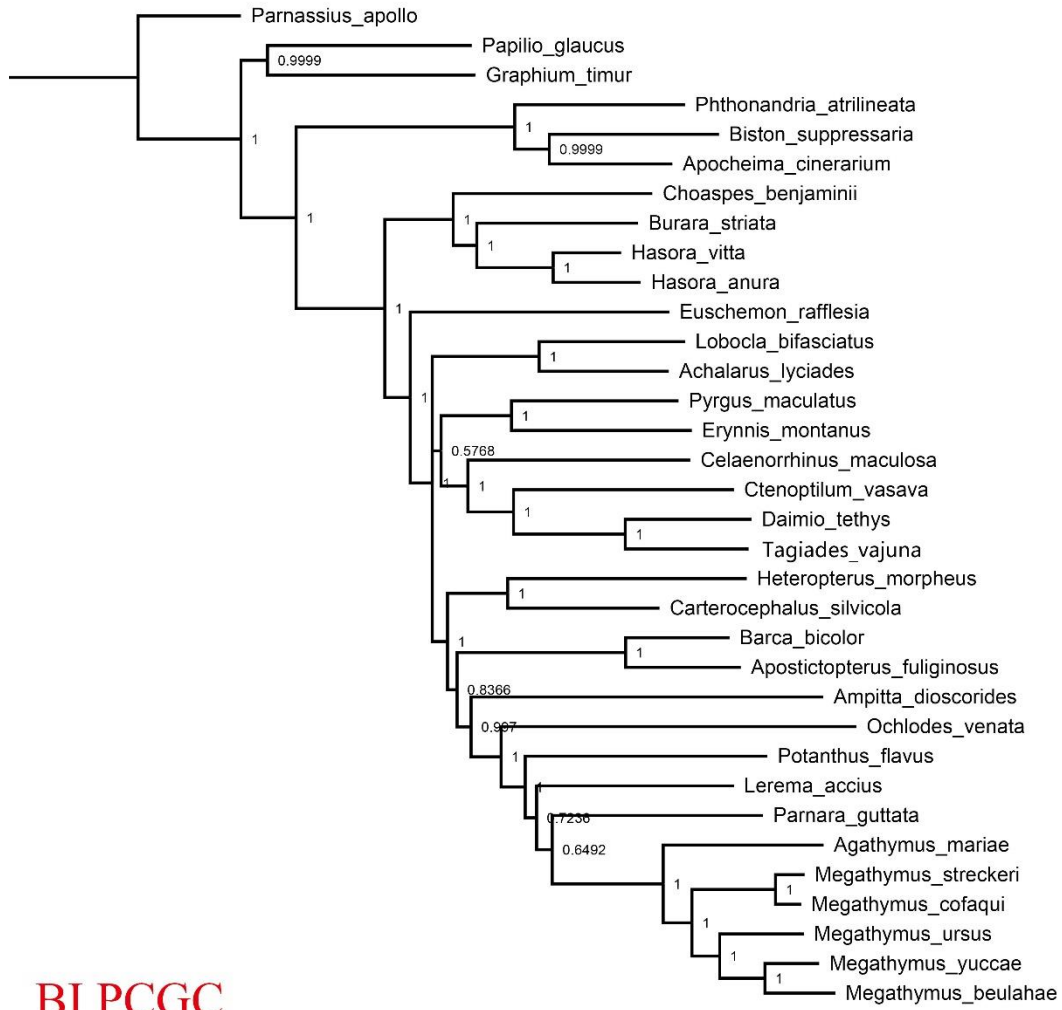

BI PCGC

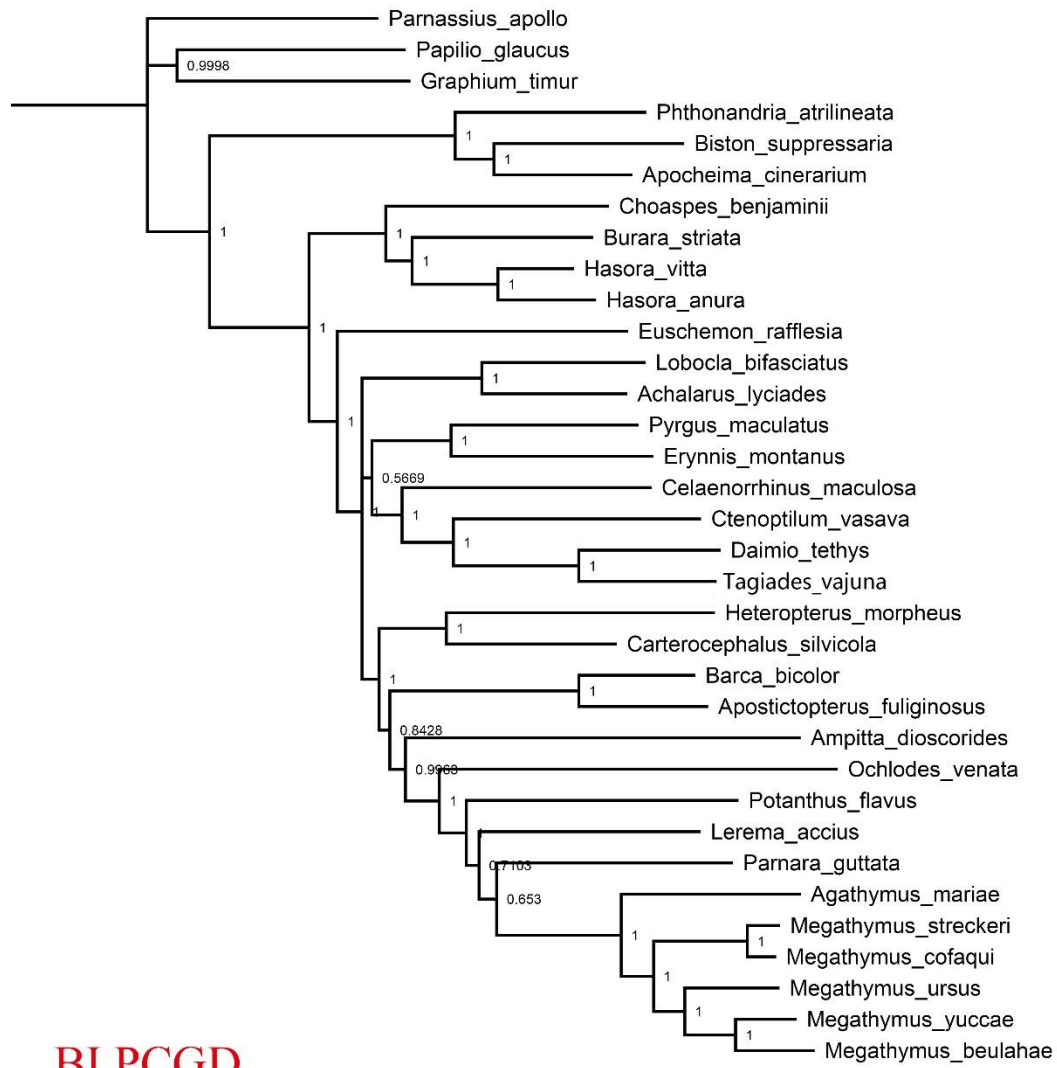

BI PCGD

0.2

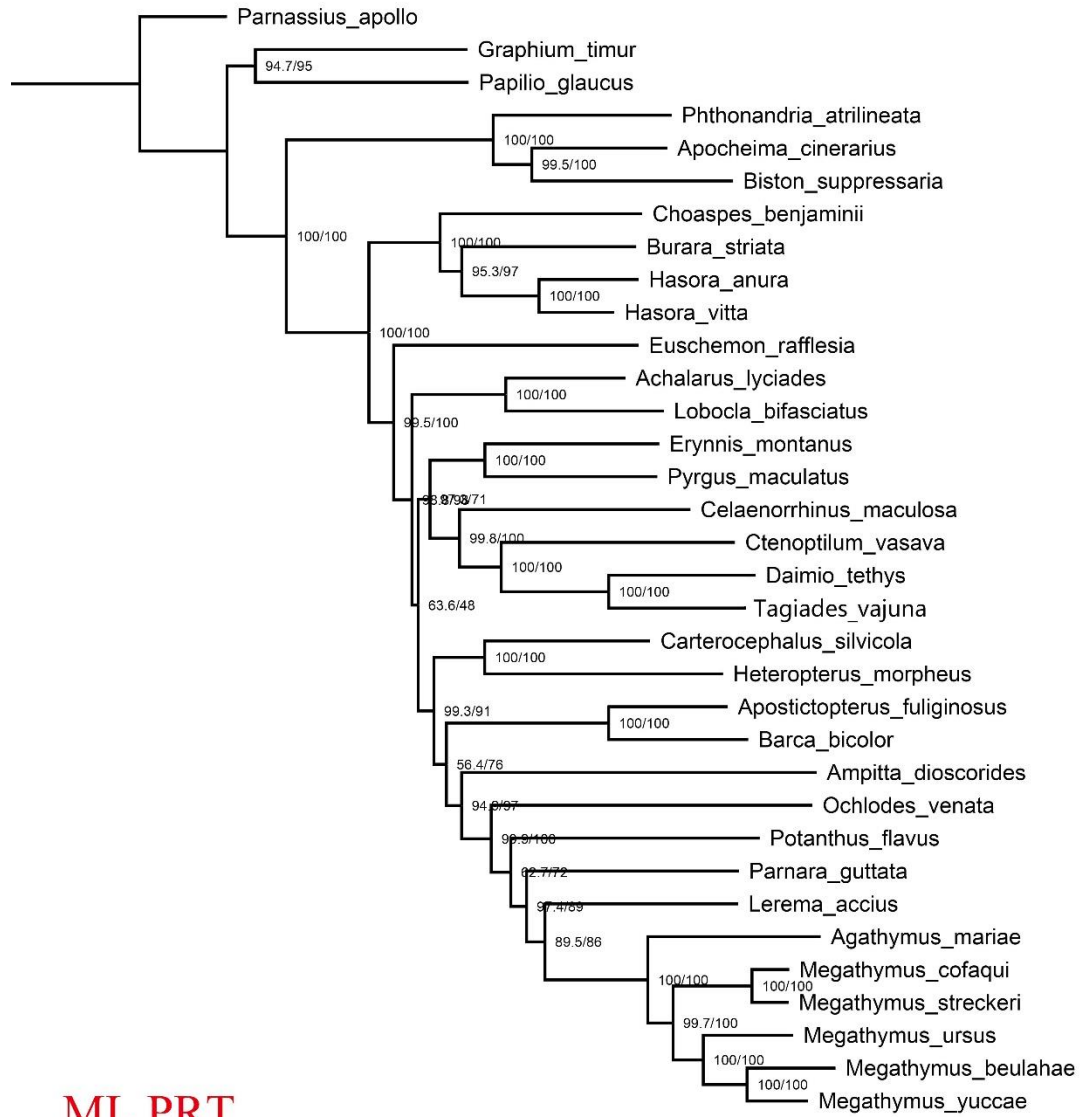

ML PRT

0.05

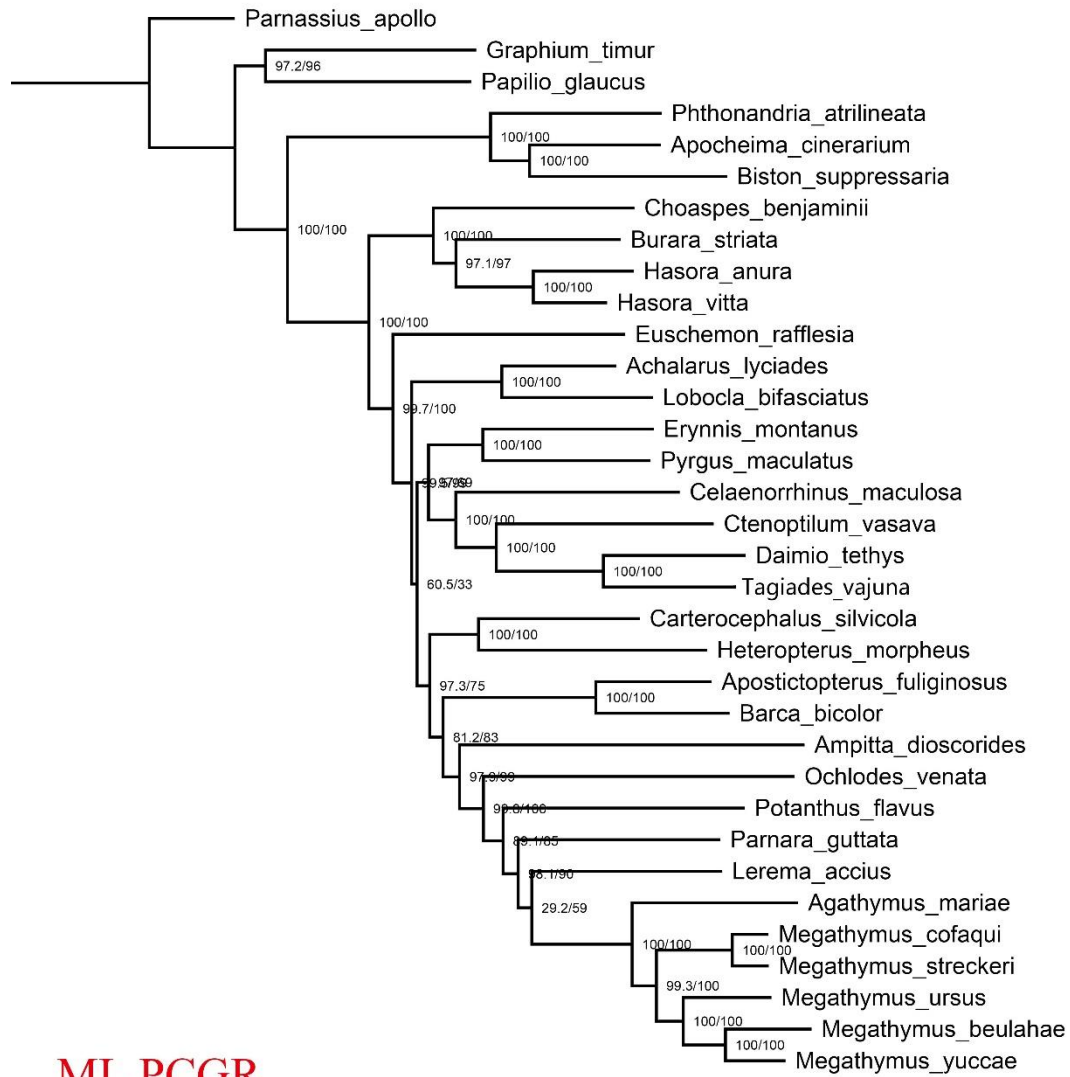

ML PCGR

0.05

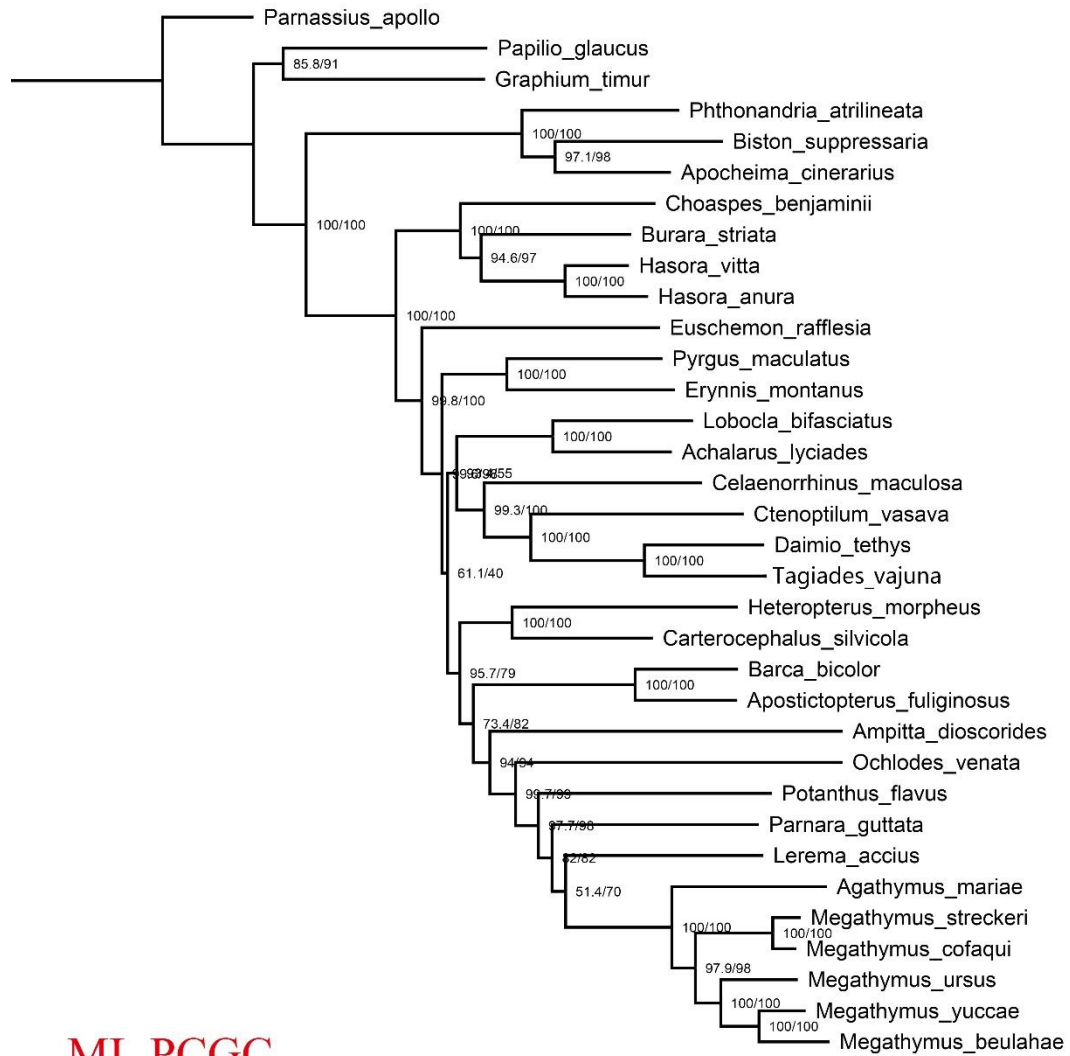

ML PCGC



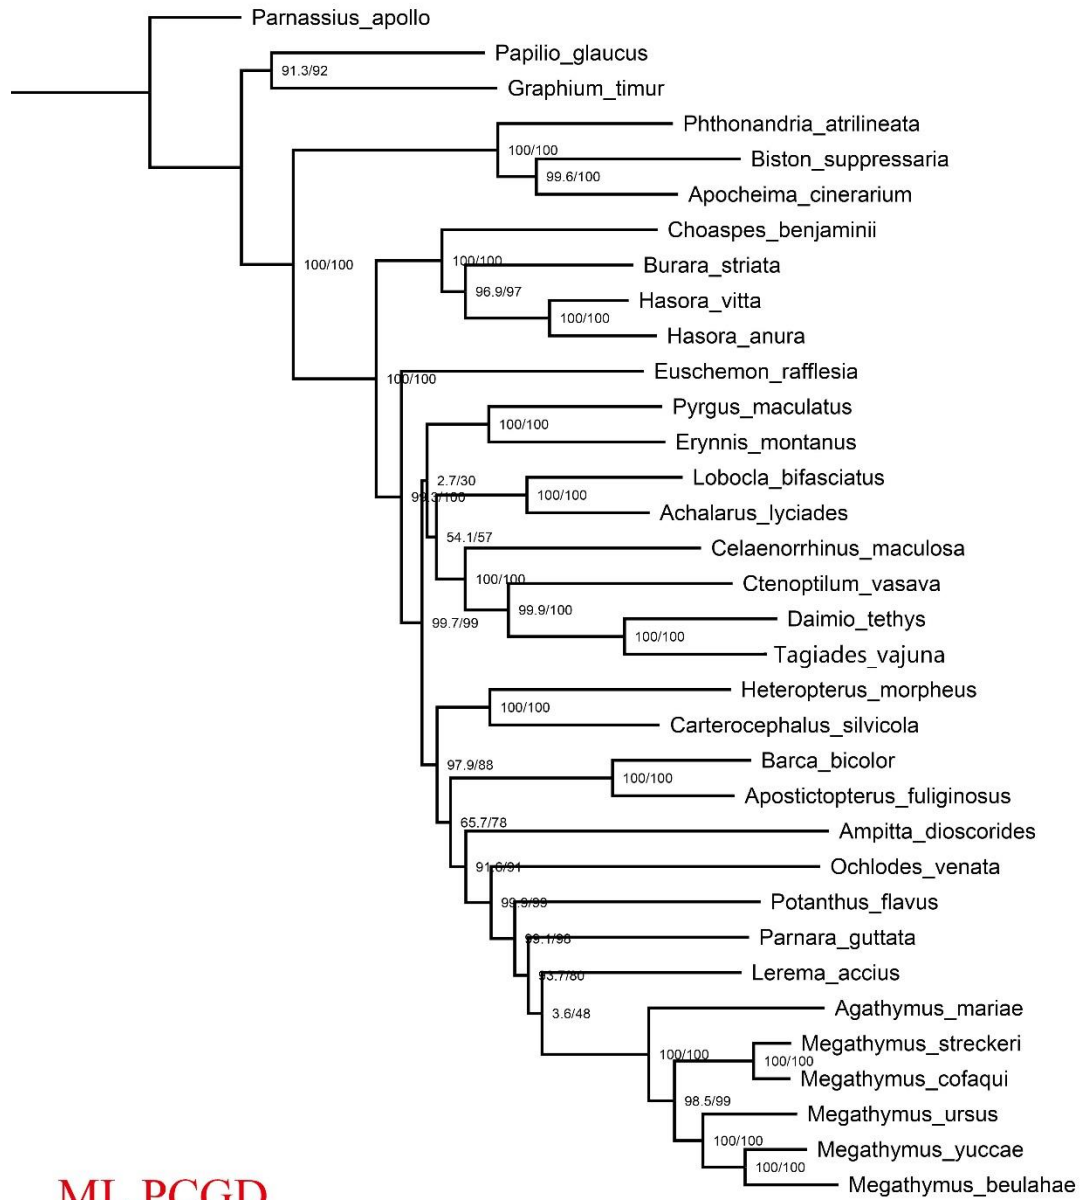

ML PCGD

0.08

**Supplementary Material S5. List of primers used to amplify and sequence two mitochondrial genomes.**

| Fragment name | Gene                      | Direction <sup>a</sup> | Sequence (5'-3')        |
|---------------|---------------------------|------------------------|-------------------------|
| SF1           | <i>tRNA<sup>Met</sup></i> | F                      | AAGCTTTTGGGYTCATACC     |
|               | <i>ND2</i>                | R                      | CAWCCTAAATTATTAATWGAWGA |
| SF2*          | <i>ND2</i>                | F                      | TCTTCWATAATAATRAAAATAGG |
|               | <i>tRNA<sup>Tyr</sup></i> | R                      | GCGATAAATTGTAAATTTAT    |
| SF3           | <i>tRNA<sup>Trp</sup></i> | F                      | AATCTTCAAAATTATTATAAAG  |
|               | <i>COI</i>                | R                      | CTTCAGGATGACCAAAAAATC   |
| SF4           | <i>COI</i>                | F                      | GGTATTTTCATCAATTTTAGG   |
|               | <i>COI</i>                | R                      | GTCGAGGTATTCCTGCTA      |
| SF5           | <i>COI</i>                | F                      | ACWGTAGGAGGATTAACAGG    |
|               | <i>COII</i>               | R                      | GTTCAAATTAATTCAATTATTTG |
| SF6           | <i>COII</i>               | F                      | TAGAAATGGCAACWTGATC     |
|               | <i>tRNA<sup>Lys</sup></i> | R                      | CTTGCTTTTCAGTCATCTAAT   |
| SF7           | <i>COII</i>               | F                      | CAGGTCGWTTAAATCAAAC     |
|               | <i>ATP6</i>               | R                      | GTTCCCTGDGGAATTATATG    |
| SF8           | <i>ATP6</i>               | F                      | TTATTTTCAATTTTGTATCC    |
|               | <i>COIII</i>              | R                      | CTCGTCATCATTGATATAT     |
| SF9           | <i>COIII</i>              | F                      | GTWGATTATAGHCCWTGACC    |
|               | <i>tRNA<sup>Gly</sup></i> | R                      | GATTGGAAGTCAAATATACT    |
| SF10*         | <i>COIII</i>              | F                      | AGCTTATGAATATTAYGAAGC   |
|               | <i>tRNA<sup>Asn</sup></i> | R                      | CAATTTTATCATTAACAGTGA   |
| SF11          | <i>ND3</i>                | F                      | TAGAAATTGCATTAATTTTHCC  |
|               | <i>ND5</i>                | R                      | CCTTATATAATTTATTACC     |
| SF12          | <i>ND5</i>                | F                      | AWAHTTCTCTTCAACCYAWATC  |
|               | <i>ND5</i>                | R                      | GCTTTATCWACTTTAAGWCA    |
| SF13          | <i>ND5</i>                | F                      | TCYTTWGAATAAAAAYCCAG    |
|               | <i>ND5</i>                | R                      | GATGGDTTAGGDTTAGTTTCTT  |
| SF14          | <i>ND5</i>                | F                      | AAAAAATATAATTTCAWCTHCC  |
|               | <i>ND4</i>                | R                      | CATTGATTWCCTTTAAATAT    |
| SF15          | <i>tRNA<sup>His</sup></i> | F                      | ATATTTTTGAYHCCACAAATC   |
|               | <i>ND4</i>                | R                      | CAGGTTCAATAATTTTAGC     |
| SF16          | <i>ND4</i>                | F                      | TTATAATACCHCCAATWAC     |
|               | <i>ND4</i>                | R                      | GGTTTAATTTTATTAAGAATTTG |
| SF17          | <i>ND4</i>                | F                      | ATATTAAGTAGGAATTAAWC    |
|               | <i>tRNA<sup>Pro</sup></i> | R                      | TAATTTTGGAGATTATWGAT    |
| SF18*         | <i>ND4L</i>               | F                      | CCTAAAGCACCTCACAWAC     |

|       |                                           |        |                                                   |
|-------|-------------------------------------------|--------|---------------------------------------------------|
|       | <i>ND6</i>                                | R      | GTAATTTTACWACWGMWAYTA                             |
| SF19  | <i>ND6</i><br><i>Cytb</i>                 | F<br>R | TNTCAAGAATTGCHTCWAATG<br>GATATTTGTCCYCAAGGTA      |
| SF20  | <i>Cytb</i><br><i>Cytb</i>                | F<br>R | TATHTHCATATTGGACGAGG<br>CCTTGDATTTTTTTATTAADGT    |
| SF21  | <i>Cytb</i><br><i>ND1</i>                 | F<br>R | ACHCCHRTTCATATTCAACC<br>GCTGAAACTAATCGAACTC       |
| SF22* | <i>ND1</i><br><i>lrRNA</i>                | F<br>R | ACCGRGGWARMGTMCTCG<br>CTGAGTTCAAACCGGTGTRA        |
| SF23  | <i>tRNA<sup>Leu</sup></i><br><i>lrRNA</i> | F<br>R | GAHTTCTAAAAYCATTAC<br>GACTGTACAAAGGTAGCATAAT      |
| SF24  | <i>lrRNA</i><br><i>lrRNA</i>              | F<br>R | CATCMAATCTTTCATACAAG<br>GTATCTTGTGTATCAGAG        |
| SF25  | <i>lrRNA</i><br><i>tRNA<sup>Val</sup></i> | F<br>R | ATTATGCTACCTTTGTACAGTC<br>GTATTTCAATTACATTGAAAAGA |
| SF26  | <i>lrRNA</i><br><i>srRNA</i>              | F<br>R | CTCTGATACACAAGATAC<br>CCAGCAGTTGCGGTAAAC          |
| SF27* | <i>srRNA</i><br><i>tRNA<sup>Ile</sup></i> | F<br>R | AATAGGTGATCTAATCCTAG<br>CTATCAGAATAATCCTTWW       |

<sup>a</sup>F and R, forward and reverse direction of transcription.

\*Primers are newly designed in this study.
